# Supplementary material for: NAcLat-DBS reduces GABAB1R expression of dopamine neurons to correct depressive symptoms in CMS mice
Source: Research Square preprint supplement (doi:10.21203/rs.3.rs-8315922/v1), 2026-01-28

**Supplementary Figure 1.** **Schematic overview of the CMS protocol**

(A) Illustrations of different stressor procedures applied in CMS mouse model. (B) Color-coded schedule of stressors administered to mice over a five-week period and each color corresponds to a specific stressor, as indicated in the key. (C) Table summarizes the time and frequency of each stressor across days of the week.

**Supplementary Figure 2.** **Long-term DBS NAcLat decreased GABAB1R expression in the dopamine neurons of VTA in CMS mouse**

(A) Experimental process of long-term DBS intervention in CMS model mice. CMS model was established during five weeks, the VTA-DA GABAB1R staining was tested after two weeks’ DBS. (B) Mice were bilaterally implanted with DBS electrode in the NAcLat area, and long-term DBS (at 130HZ) treatment for two weeks. (C) Schematic of electrode implantation in bilateral NAcLat. (D) The c-fos expression of VTA DA neurons in the Control, CMS and CMS-DBS groups. (E) Brain slices immunostaining was carried out after long-term DBS treatment in rnascope for GABAB1R expression in VTA DA neurons. (F) Brain slices immunostaining was carried out after long-term DBS treatment in rnascope for GABAB1R expression in VTA GABA neurons. (G) The Gabbr1 expression intensity in the DA neurons of Control, CMS and CMS-DBS groups. (H) The Gabbr1 expression intensity in the GABA neurons of Control, CMS and CMS-DBS groups. All data are expressed as mean ± SEM. Multiple *t-test* analysis for (G) and (H).

**Supplementary Figure 3.** **Transfecting GABAB1R in VTA dopamine neurons augment depression susceptibility during chronic mild stress**

(A) Experimental process of the virus injection (AAV9-TH-Gabbr1/AAV9-TH-mcherry) and chronic mild stress modeling. (B) left: the virus injection of AAV9-TH-mcherry/AAV9-TH-Gabbr1-mcherry in the VTA. right: representative images of overexpression GABAB1R in the VTA DA neurons (TH-Gabbr1). (C) The force swim immobile time in the Control, CMS, CMSTH-mcherry and CMSTH-Gabbr1 groups subjecting 21 days of CMS. (D)-(E) The time spent in center and total distance were tested in the Control, CMS, CMSTH-mcherry and CMSTH-Gabbr1 groups subjecting 21 days of CMS. (F) Track diagram of spontaneous activity in OFT about the Control, CMS, CMSTH-mcherry and CMSTH-Gabbr1 groups. (G) Experimental process of the virus injection (AAV9-Gabbr1-RNAi/AAV9-TH-vehicle) and chronic mild stress modeling. (H) left: the virus injection of AAV9-TH-vehicle/ AAV9-Gabbr1-RNAi in the VTA; right: the representative GABAB1R expression in the VTA. (I) The force swim immobile time in the Control, CMS, CMSTH-vehicle and CMSTH-Gabbr1-RNAi groups subjecting 35 days of CMS. (J)-(K) The time spent in center and total distance were tested in the Control, CMS, CMSTH-vehicle and CMSTH-Gabbr1-RNAi groups subjecting 35 days of CMS. (L) Track diagram of spontaneous activity in OFT about the Control, CMS, CMSTH-vehicle and CMSTH-Gabbr1-RNAi groups. All data are expressed as mean ± SEM. Multiple *t-test* analysis for (C)-(E) and (I)-(K).

**Supplementary Figure 4.** **Inhibition of VTA-GABAB1R increased the CMS mice’s center exploration time in open field test**

(A-B) Experimental scheme of the intraperitoneally CGP35348 (1mg/kg/d) administration for fourteen days in the Control and CMS groups. (C) Track diagram of spontaneous activity after CGP35348 administration for 0 day, 3 days, 7 days, 10 days and 14 days in the OFT. (D) Line graph: the change of total distance during CGP administration in the Control and CMS groups. (E) Line graph: the time spent in the center during CGP administration in the Control and CMS groups. All data are expressed as mean ± SEM. Multiple *t-test* analysis for (B) and (D), n=4.


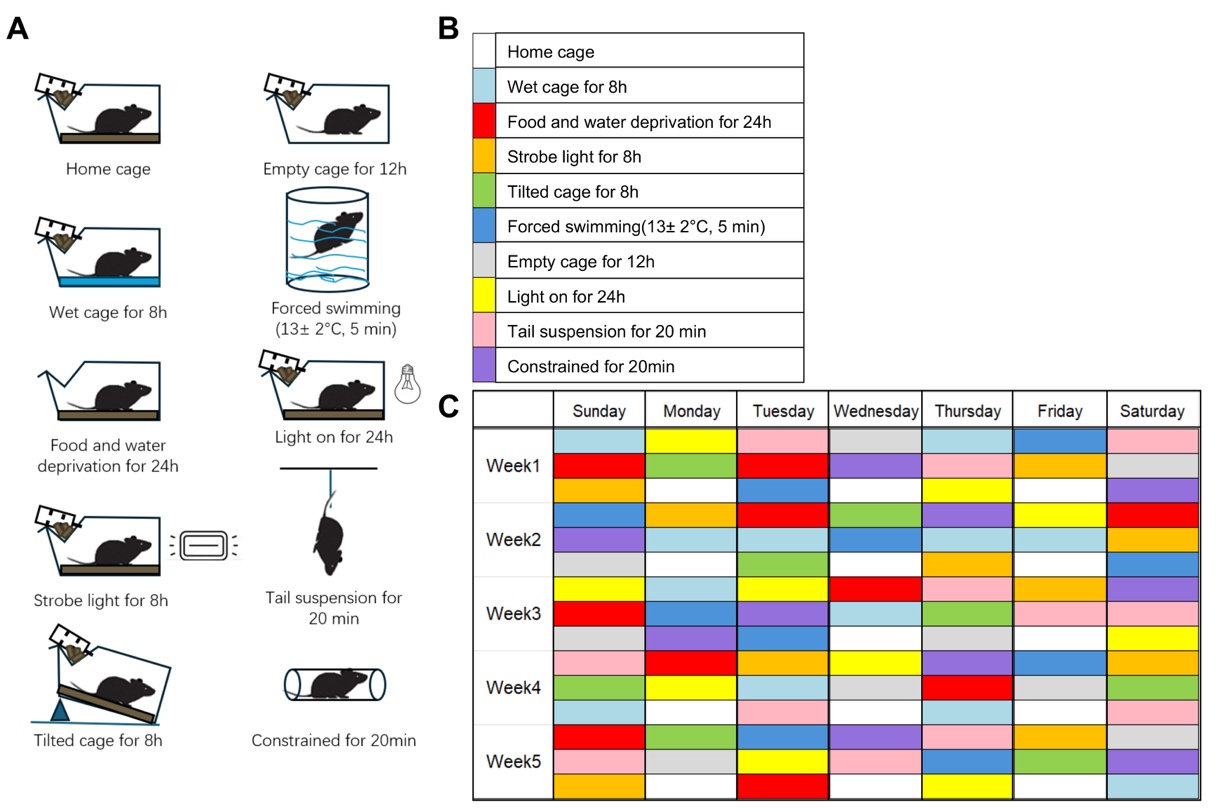
**Supplementary Figure 1**


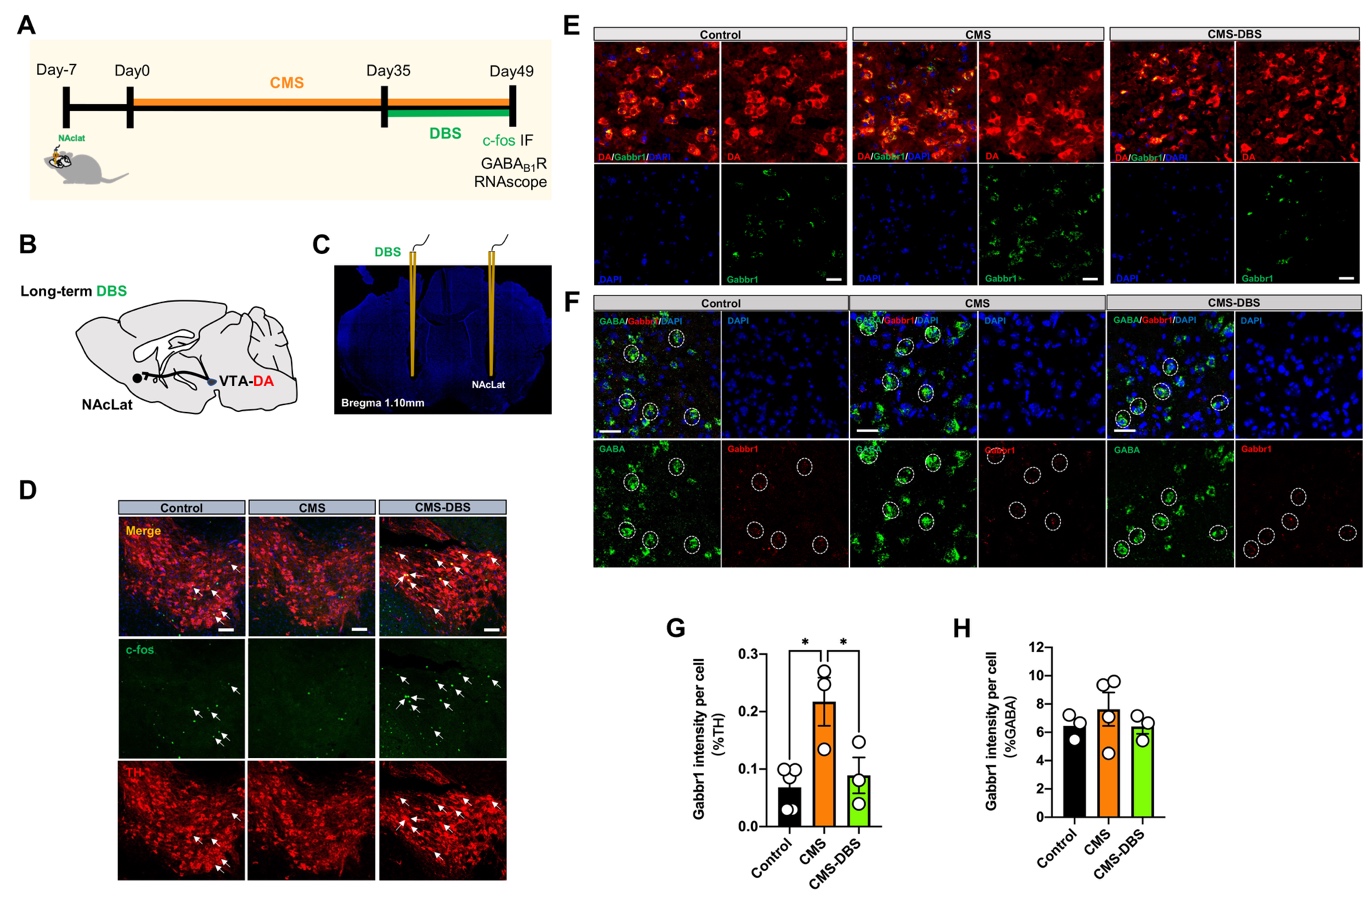
**Supplementary Figure 2**

**Supplementary Figure 3**


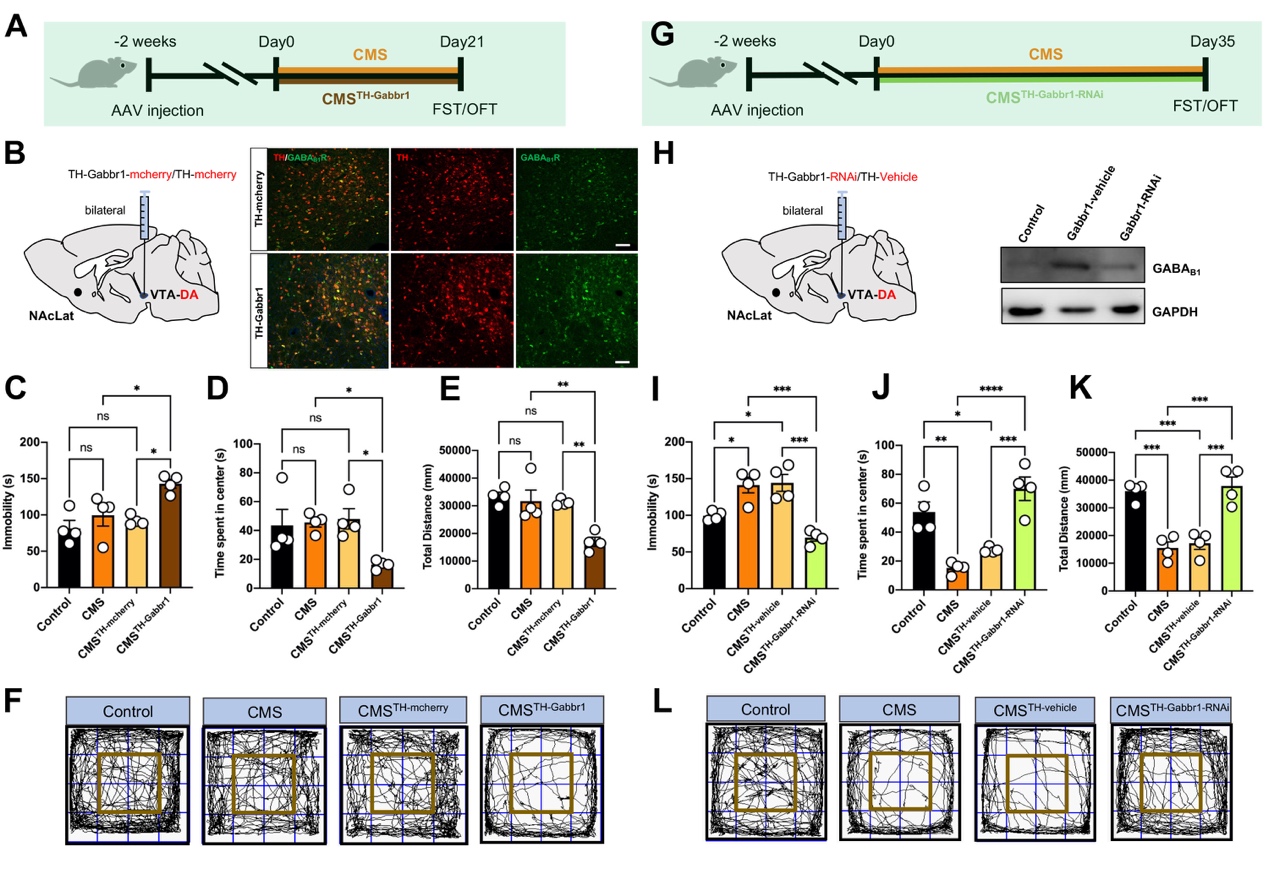


**Supplementary Figure 4**


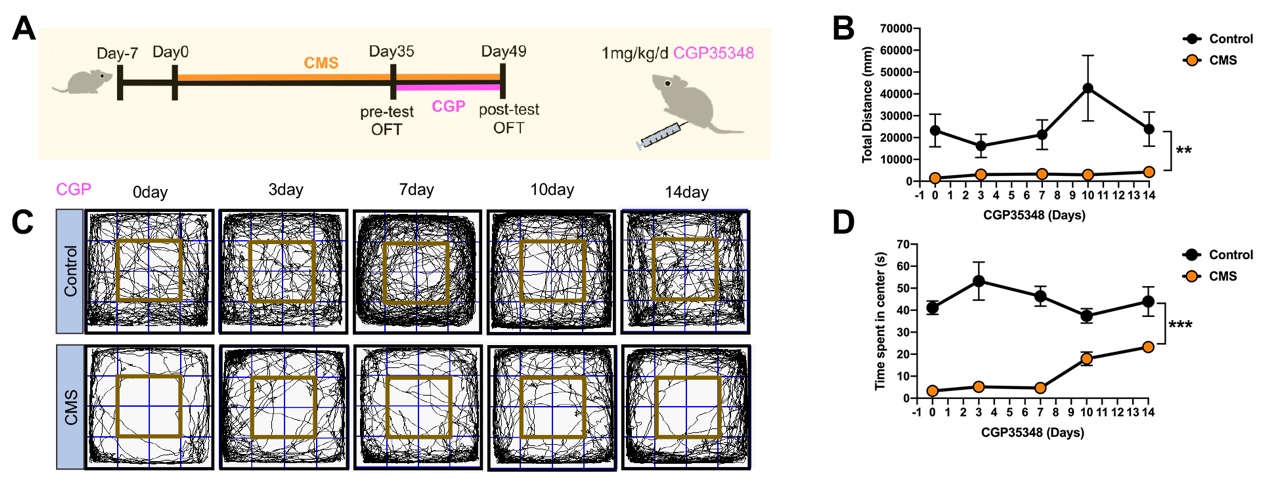

Supplement: Supplementary file 1 [file 050b5b91e2b9305d5311956a.docx]
